# Supplementary material for: Improved Photoelectrochemical Performance of MoS2 through Morphology-Controlled Chemical Vapor Deposition Growth on Graphene
Source: MDPI journal article supplement (doi:10.3390/nano11061585), 2021-06-17
Supplement: s1 [file s1]

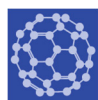

Supporting Information

# Improved Photoelectrochemical Performance of MoS<sub>2</sub> through Morphology-Controlled Chemical Vapor Deposition Growth on Graphene

Dong-Bum Seo, Tran Nam Trung, Sung-Su Bae and Eui-Tae Kim \*

Department of Materials Science & Engineering, Chungnam National University, Daejeon 34134, Korea; sdb987@naver.com (D.-B.S.); trannamtrung@qnu.edu.vn (T.N.T.); bss1007@naver.com (S.-S.B.)

\* Correspondence: etkim@cnu.ac.kr

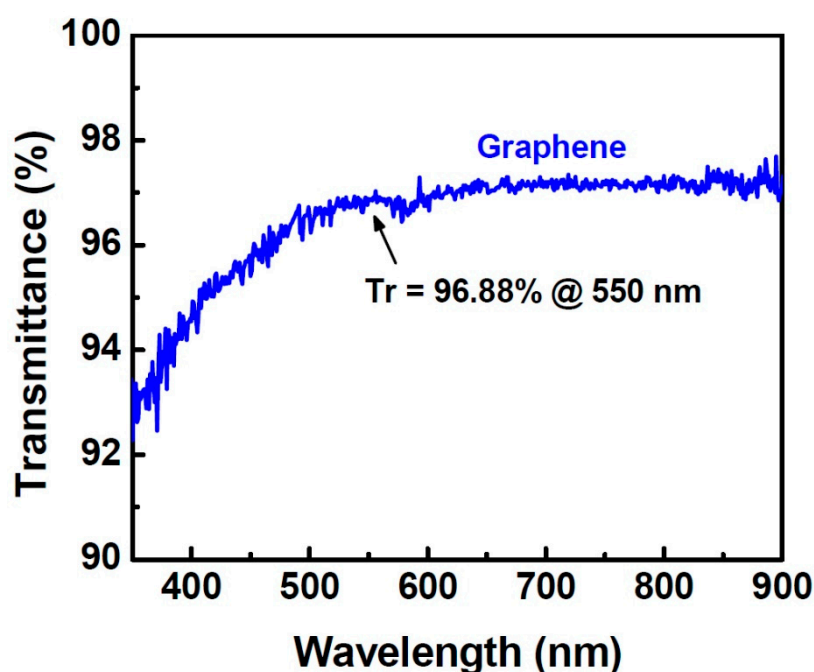

**Figure S1.** UV-Vis absorption spectrum of pristine graphene, exhibiting a light transmittance of 96.88 % at 550 nm.

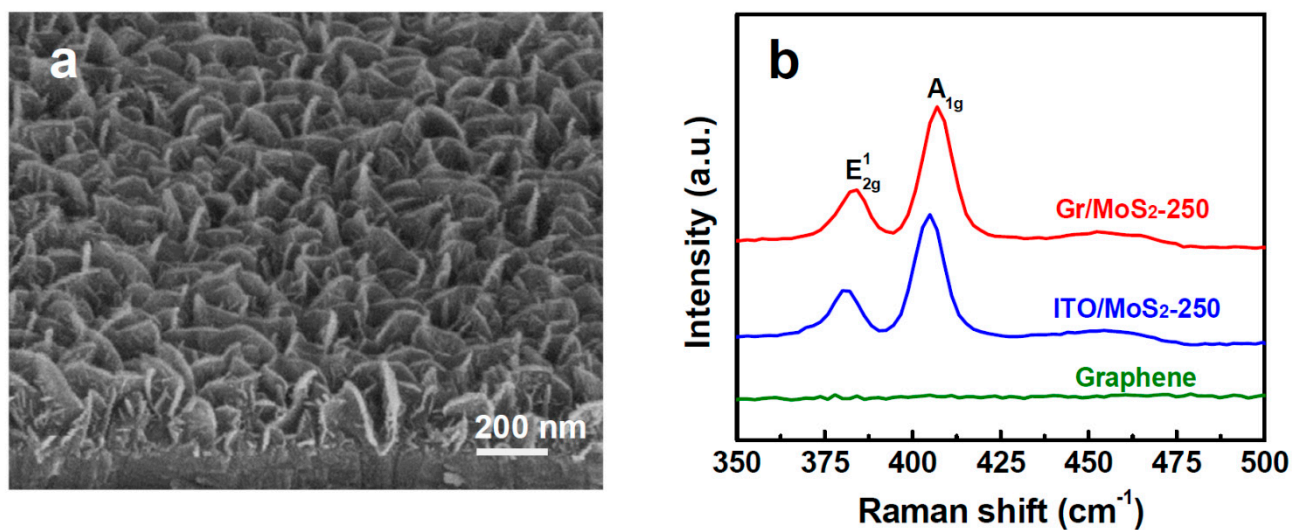

**Figure S2.** (a) SEM image of few-layer MoS<sub>2</sub> nanosheets grown on ITO (ITO/MoS<sub>2</sub>-250). (b) Raman spectra of ITO/MoS<sub>2</sub>-250, G/MoS<sub>2</sub>-250, and pristine graphene.

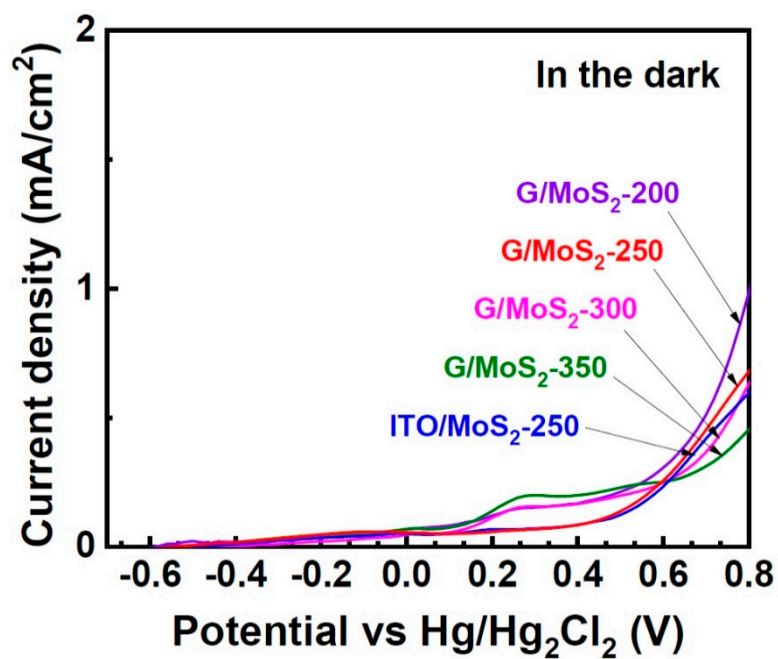

**Figure S3.** Dark current density–potential curves of PEC cells with various working electrodes (ITO/MoS<sub>2</sub>-250, G/MoS<sub>2</sub>-200, G/MoS<sub>2</sub>-250, G/MoS<sub>2</sub>-300, and G/MoS<sub>2</sub>-350).
